# Supplementary material for: Lignin-based polyurethane film reinforced with cellulose nanocrystals
Source: Royal Society of Chemistry journal article supplement (doi:10.1039/c4ra04461d), 2014-01-01
Supplement: c4ra04461d1.pdf [file c4ra04461d1.pdf]

## Lignin-based polyurethane film reinforced with cellulose nanocrystals

Bai-Liang Xue,<sup>a</sup> Jia-Long Wen,<sup>a</sup> Run-Cang Sun\*<sup>a,b</sup>

<sup>a</sup>Beijing Key Laboratory of Lignocellulosic Chemistry, Beijing Forestry University, Beijing 100083, China

<sup>b</sup>State Key Laboratory of Pulp and Paper Engineering, South China University of Technology, Guangzhou 510640, China

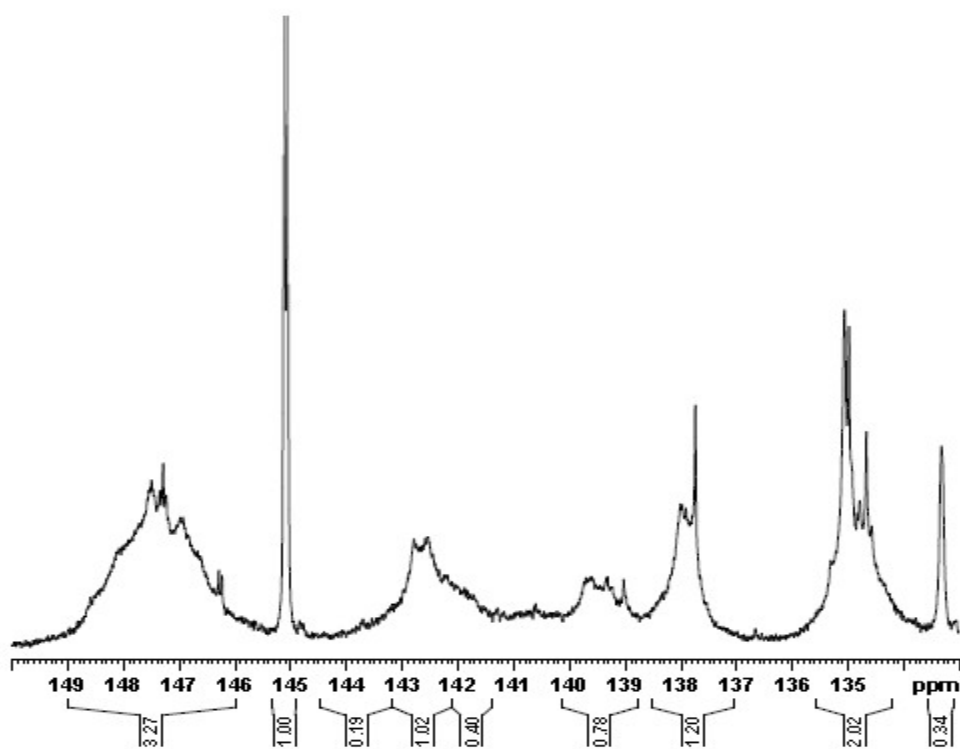

**Figure S1.** <sup>31</sup>P NMR spectra of the lignin

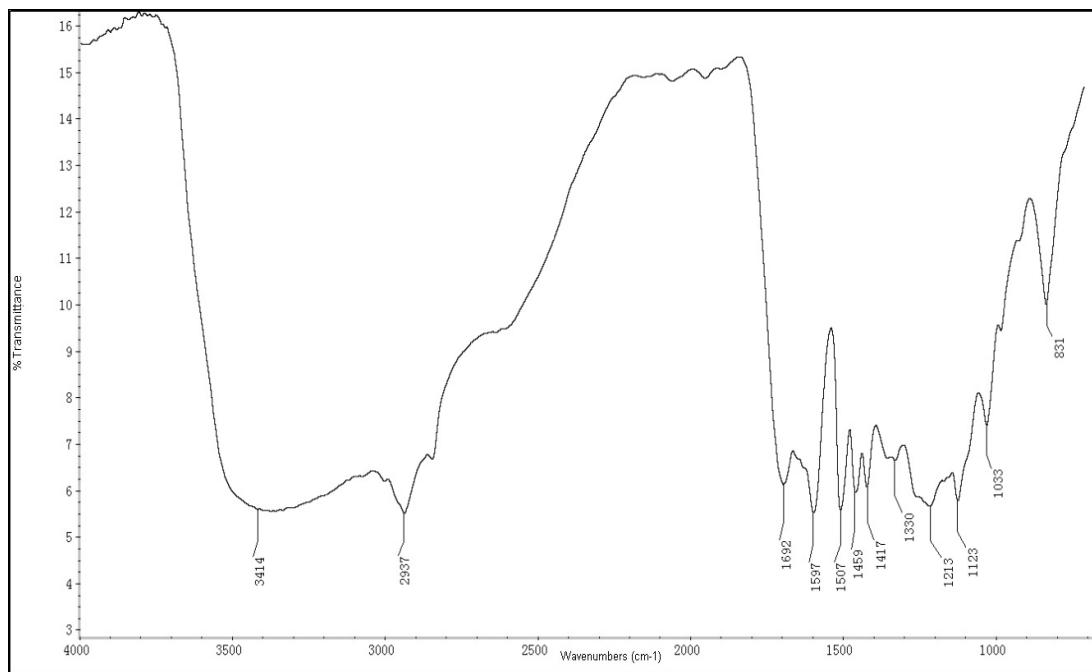

**Figure S2.** FT-IR spectra of the lignin

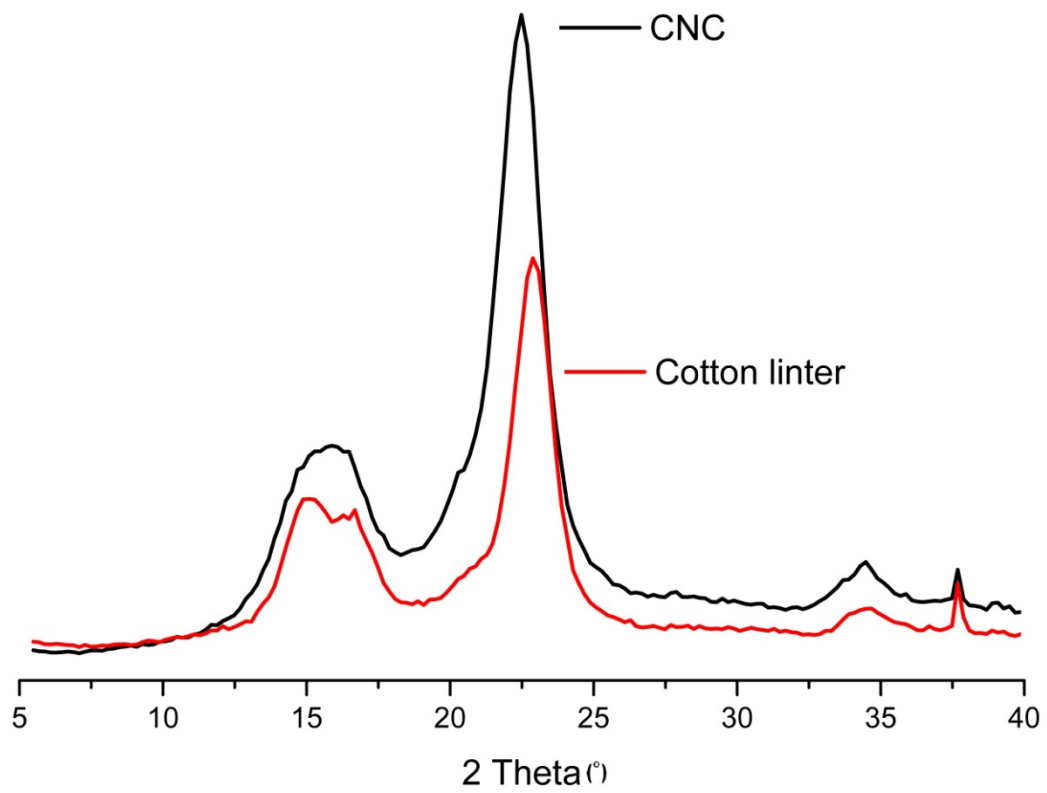

**Figure S3.** XRD pattern of cotton linter and CNC
